# Supplementary material
Source: ML conference proceedings conference paper supplement (https://openreview.net/forum?id=o-1v9hdSult)
Supplement: supplementary_material [file attachment]

## Instructions for the study

***Please read the following instructions carefully***

In the following study, you will be asked to help evaluate possible explanation strategies within the context of an Atari Game called Montezuma's revenge - A game in which you play as 'Panama Joe' and can perform eight actions: move-up, move-left, move-right, move-down, jump-up, jump-right, jump-left, and wait. In the study, you will be shown a plan that Joe can follow to achieve some goal, and then shown a question about a possible alternative plan. Your job then will be to select from two alternatives what you feel is a more reasonable explanation for that question.

Before you are taken to the page with the plan and the question, you will be shown a set of concepts relevant to the game that will form the vocabulary for the explanations.

***Please make sure to familiarize yourself with the concepts before moving on to the questions***

***Also, do not refresh the window or press the back button on any page in the study.***

Show Concepts

# Concepts:

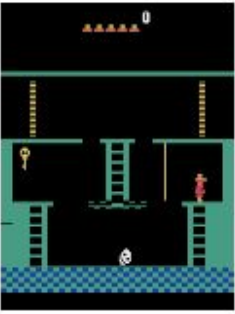

## On middle platform

This means Joe is on the middle platform

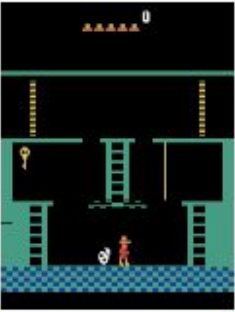

## On ground

This means Joe is on the ground

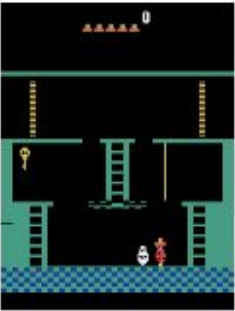

## Skull on left

This means there is skull right next to Joe on the left side

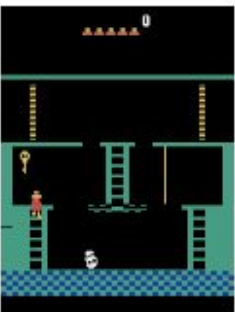

## On first ladder

This means Joe is on the leftmost ladder

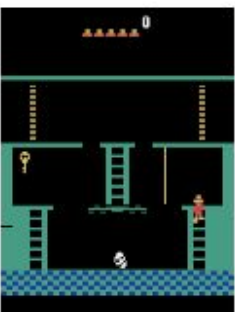

## On third ladder

This means Joe is on the rightmost ladder

Show Plan

## Plan and the alternate plan

Click anywhere on the video below to view the plan:

Plan goal: Get to the key

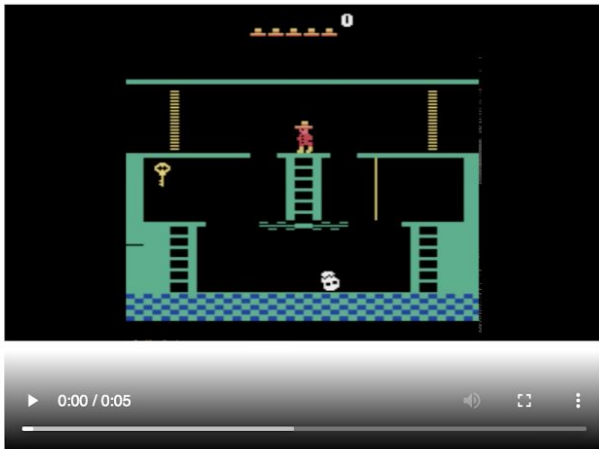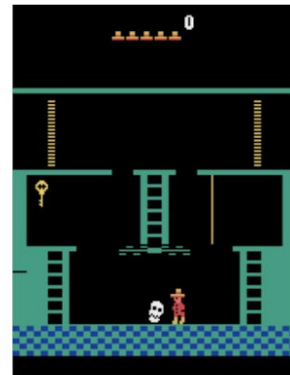

**Alternate plan suggested by the user:** Follow the plan till you are next to the skull as in the shown image, then move-left (instead of jump-left) and then follow the rest of the plan.

Explain why the alternate plan will fail

## Explanation for why the alternate plan would fail

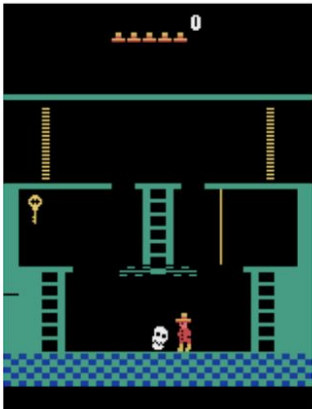

The alternate plan suggested by the user was: Follow the plan till you are next to the skull as in the shown image, then move-left (instead of jump-left) and then follow the rest of the plan.

Please select the explanation that you find the most useful:

- ☒ You can not perform the action move-left in a state where -- "Skull on left" is True. Hence, the action move-left will fail in the alternate plan in the state shown in the image.
- ☐ In the alternate plan, you can not perform the action move-left in the state shown in the image

Submit

## Explanation feedback

**How complete was the explanation "move left can't be done when `skull on left` is True"?**

- ☒ Not at all complete
- ☐ Slightly complete
- ☐ Moderately complete
- ☐ Very complete
- ☐ Fully complete

**What other information would be useful (if any):**

Submit

# Background information

Please enter Age:

Select gender

Do not specify

Select education

I have a under-graduate degree

Have you attended any AI classes?

☐ Yes ☐ No

If you have attended any AI classes, are you aware of any Automated Planning techniques?

☐ Yes ☐ No

If you are aware of any automated planning techniques, then specify planning formalisms you are familiar with:

Submit information and finish study

**Thank you for taking the study. You may close the window now.**
